# Supplementary material for: Identifying Trustworthiness Challenges in Deep Learning Models for Continental-Scale Water Quality Prediction
Source: Research Square preprint supplement (doi:10.21203/rs.3.rs-6248689/v1), 2025-03-25
Supplement: Supplementary file 1 [file 6d7ffd5a7060bc2345a1254d.pdf]

## Supplementary Information

# Identifying Trustworthiness Challenges in Deep Learning Models for Continental-Scale Water Quality Prediction

**Xiaobo Xia**<sup>1,2</sup>   **Xiaofeng Liu**<sup>3,4</sup>   **Jiale Liu**<sup>5</sup>   **Kuai Fang**<sup>6</sup>  
**Lu Lu**<sup>2</sup>   **Samet Oymak**<sup>7</sup>   **William S. Currie**<sup>3,4</sup>   **Tongliang Liu**<sup>1</sup>

<sup>1</sup>School of Computer Science, University of Sydney, Sydney, NSW 2008, Australia

<sup>2</sup>Department of Statistics and Data Science, Yale University, New Haven, CT 06511, USA

<sup>3</sup>Michigan Institute for Data and AI in Society, University of Michigan, Ann Arbor, MI 48105, USA

<sup>4</sup>School for Environment and Sustainability, University of Michigan, Ann Arbor, MI 48109, USA

<sup>5</sup>College of Information Science and Technology, Penn State University, University Park, PA 16802, USA

<sup>6</sup>Department of Earth System Science, Stanford University, Stanford, CA 94305, USA

<sup>7</sup>Department of Electrical Engineering and Computer Science, University of Michigan, Ann Arbor, MI 48109, USA

{XIAOBXIA.UNI@GMAIL.COM   XIAOFENG.LIU0202@GMAIL.COM}

---

<sup>†</sup>Corresponding author.

## Table of content

### Supplementary figures

- **Fig. S1.** Spatial distribution of studied basins classified by land uses. Following the USGS classification criteria [1], agricultural basins (AG, red) are defined as having more than 50% agricultural land (PLANTNLCD06 in the GAGES-II database) and at most 5% urban land (DEVNLCD06). Undeveloped basins (UD, green) have at most 5% urban land and at most 25% agricultural land. Urban basins (UR, purple) are defined as having more than 25% urban land and at most 25% agricultural land, while mixed basins (MX, yellow) include all other combinations of urban, agricultural, and undeveloped land. Among the selected basins, 3.1% were classified as AG, 11.2% as UR, 35.1% as UD, and 50.6% as MX.
- **Fig. S2.** Multi-task LSTM model performances across undeveloped basins (UD), urban basins (UR), mixed basins (MX), and agricultural basins (AG), are shown as the cumulative distribution function (CDF) of the KGE. Curves that remain lower demonstrate better performance.
- **Fig. S3.** Water quality data coverage (%) across basins of different land use types, computed as the ratio of days monitored to the total number of days between 01/01/1982 and 12/31/2018. A coverage of 100% indicates that water quality measurements were available for the entire study period and 0% indicates no measurements were available. The boxplots display the median (central line), interquartile range (IQR, represented by the boxes spanning the first (Q1) to the third quartile (Q3)), and whiskers extending to  $Q1 - 1.5 \times IQR$  and  $Q3 + 1.5 \times IQR$ .
- **Fig. S4.** Simplicity index distributions across undeveloped basins (UD), urban basins (UR), mixed basins (MX), and agricultural basins (AG). The simplicity index (adapted from [2]) quantifies the proportion of variance in water quality dynamics explained by linear relationships with runoff and annual cycles. Lower CDF (cumulative distribution function) curves indicate higher simplicity.
- **Fig. S5.** Context-dependent feature importance (KGE reduction) of meteorological variables (M) and runoff (Q) derived via the Traverse method. Dark blue boxplots represent KGE reduction from excluding Q when M is already excluded, whereas light blue boxplots represent excluding Q when M is included. Similarly, dark red boxplots show the KGE reduction from excluding M when Q is absent, whereas light red boxplots represent excluding M when Q is included. Wilcoxon signed-rank tests were conducted to assess whether median KGE reductions from subsets lacking Q or M were significantly greater than those from subsets where Q or M were present ( $***p \leq 0.001$ ). The results indicate that meteorological variables become largely redundant when runoff is included.

### **Supplementary tables**

- **Table S1.** Summary of the studied water quality variables and the average number of observations per basin, based on 482 U.S. rivers between 01/01/1982 and 12/31/2018.
- **Table S2.** Model input features, consisting of 25 time series variables and 49 static basin attributes (sourced from the GAGES-II database).

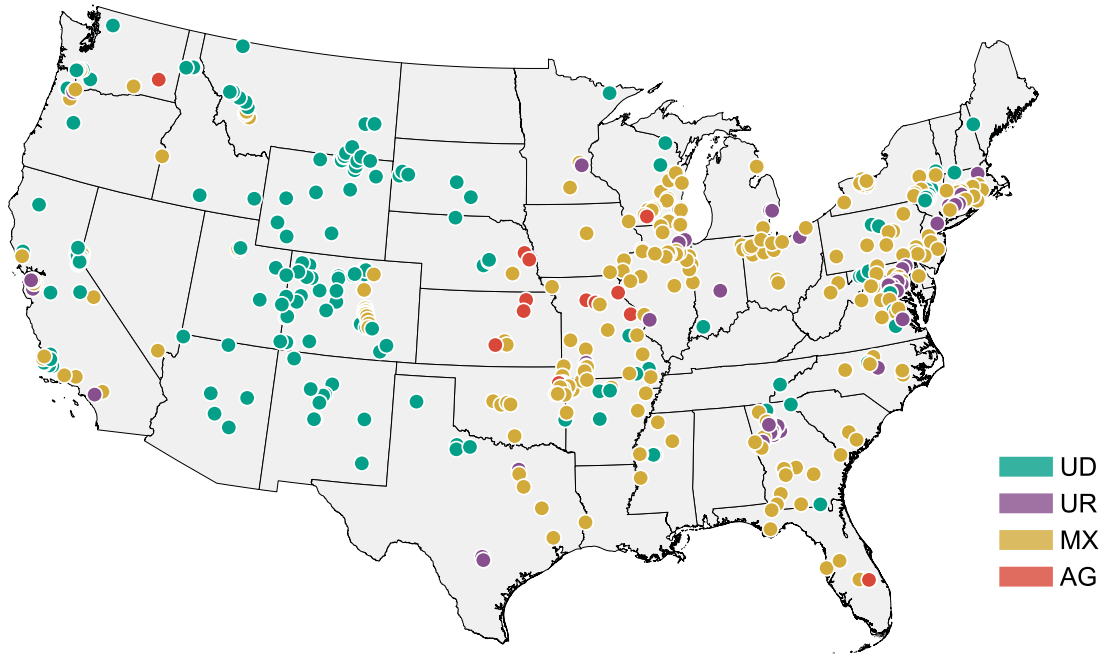

**Fig. S1.** Spatial distribution of studied basins classified by land uses. Following the USGS classification criteria [1], agricultural basins (AG, red) are defined as having more than 50% agricultural land (PLANTNLCD06 in the GAGES-II database) and at most 5% urban land (DEVNLCD06). Undeveloped basins (UD, green) have at most 5% urban land and at most 25% agricultural land. Urban basins (UR, purple) are defined as having more than 25% urban land and at most 25% agricultural land, while mixed basins (MX, yellow) include all other combinations of urban, agricultural, and undeveloped land. Among the selected basins, 3.1% were classified as AG, 11.2% as UR, 35.1% as UD, and 50.6% as MX.

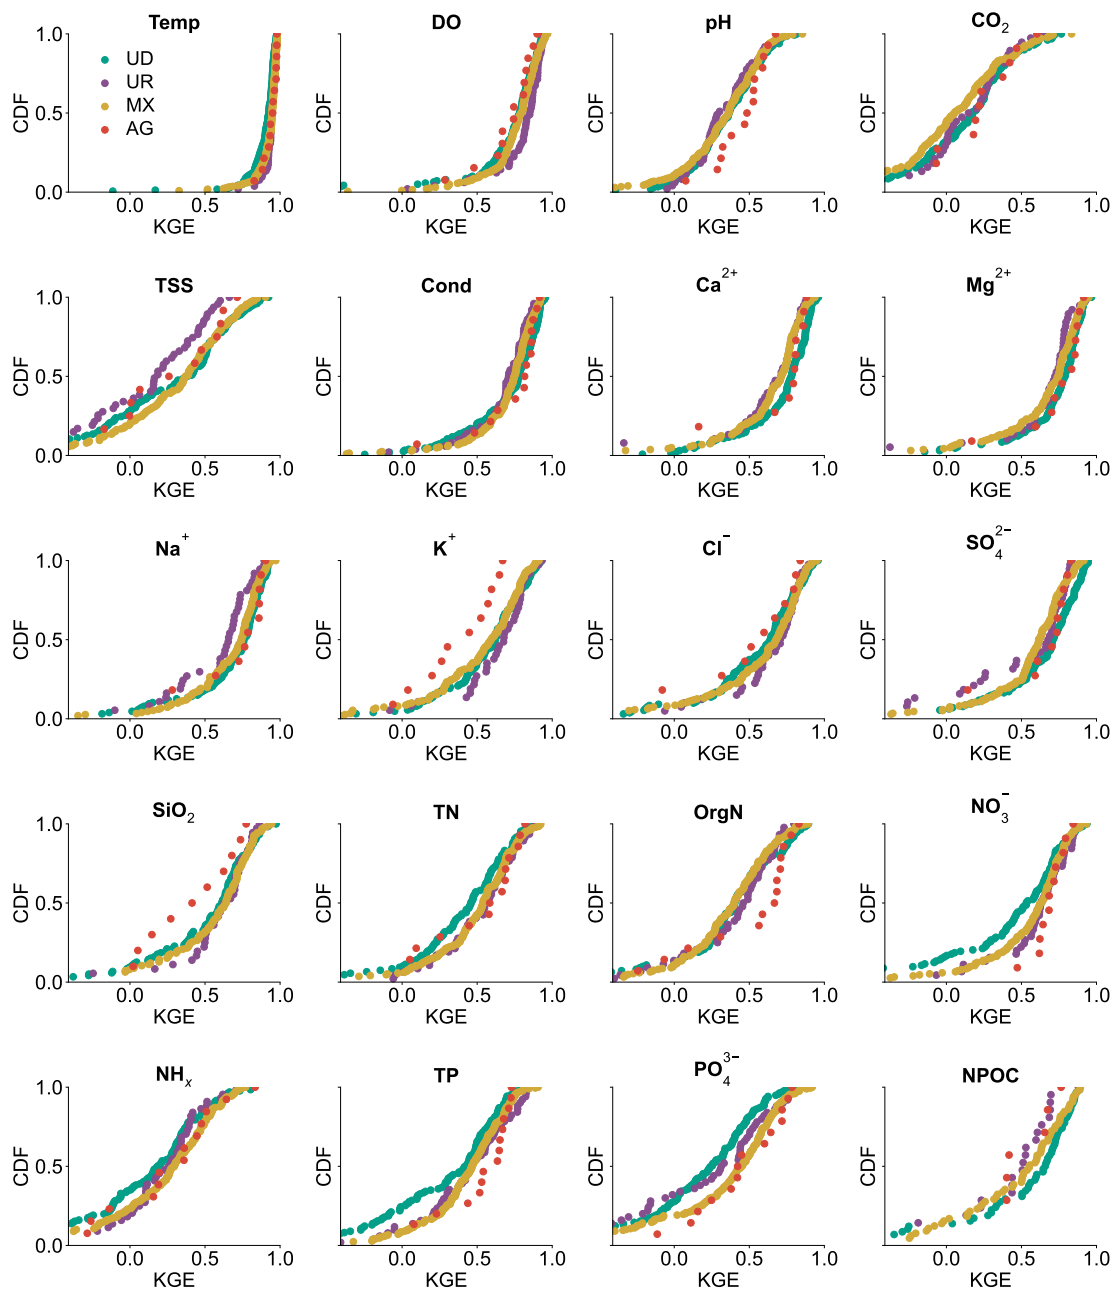

**Fig. S2.** Multi-task LSTM model performances across undeveloped basins (UD), urban basins (UR), mixed basins (MX), and agricultural basins (AG), are shown as the cumulative distribution function (CDF) of the KGE. Curves that remain lower demonstrate better performance.

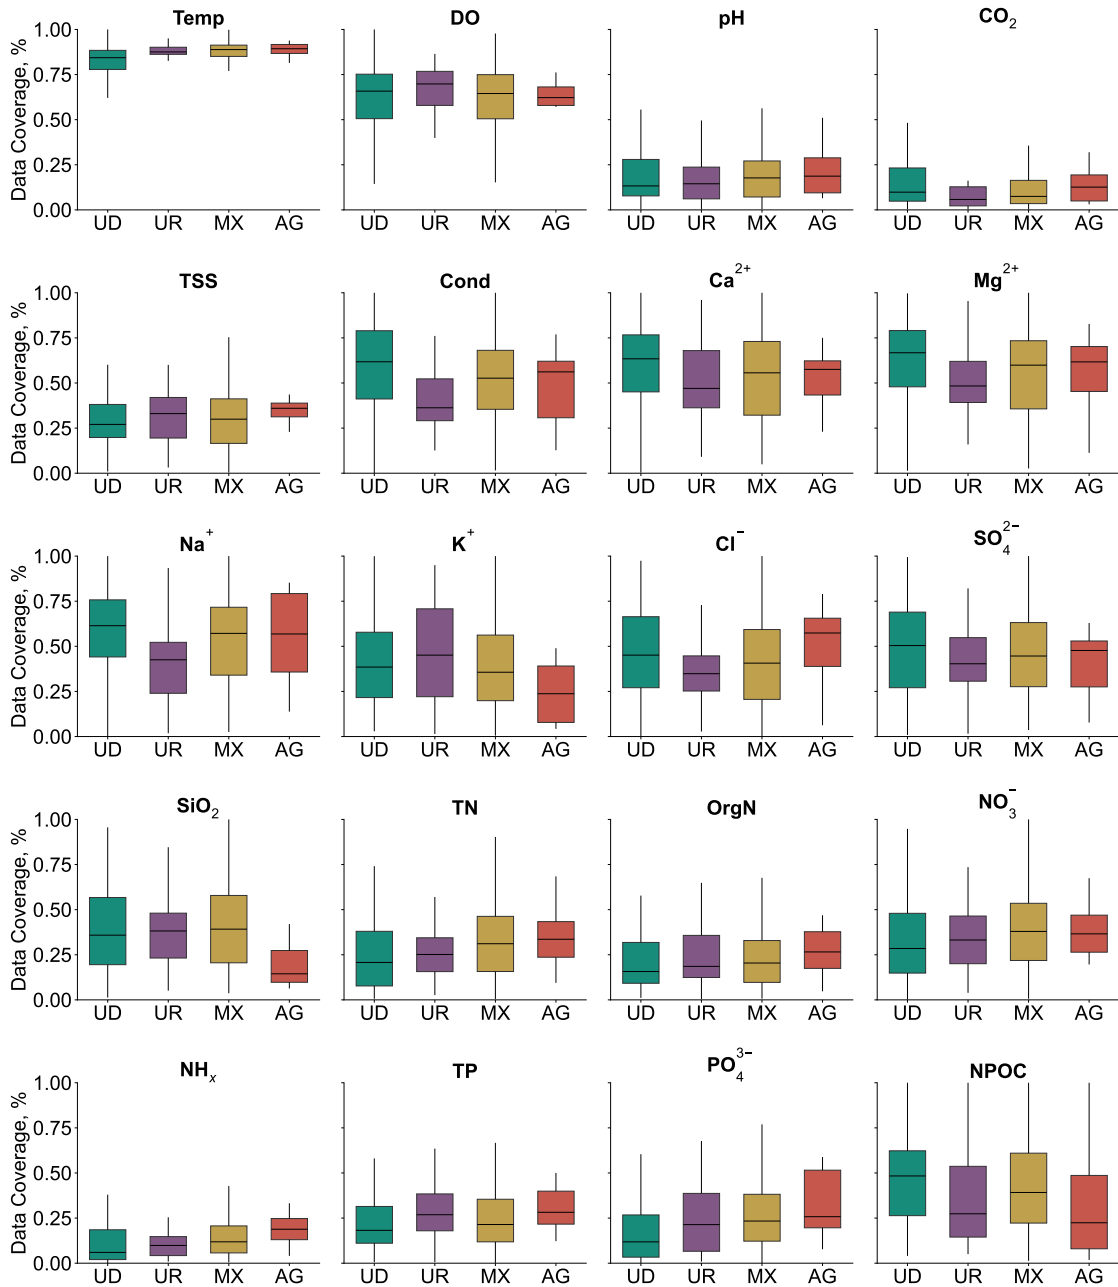

**Fig. S3.** Water quality data coverage (%) across basins of different land use types, computed as the ratio of days monitored to the total number of days between 01/01/1982 and 12/31/2018. A coverage of 100% indicates that water quality measurements were available for the entire study period and 0% indicates no measurements were available. The boxplots display the median (central line), interquartile range (IQR, represented by the boxes spanning the first (Q1) to the third quartile (Q3)), and whiskers extending to  $Q1 - 1.5 \times IQR$  and  $Q3 + 1.5 \times IQR$ .

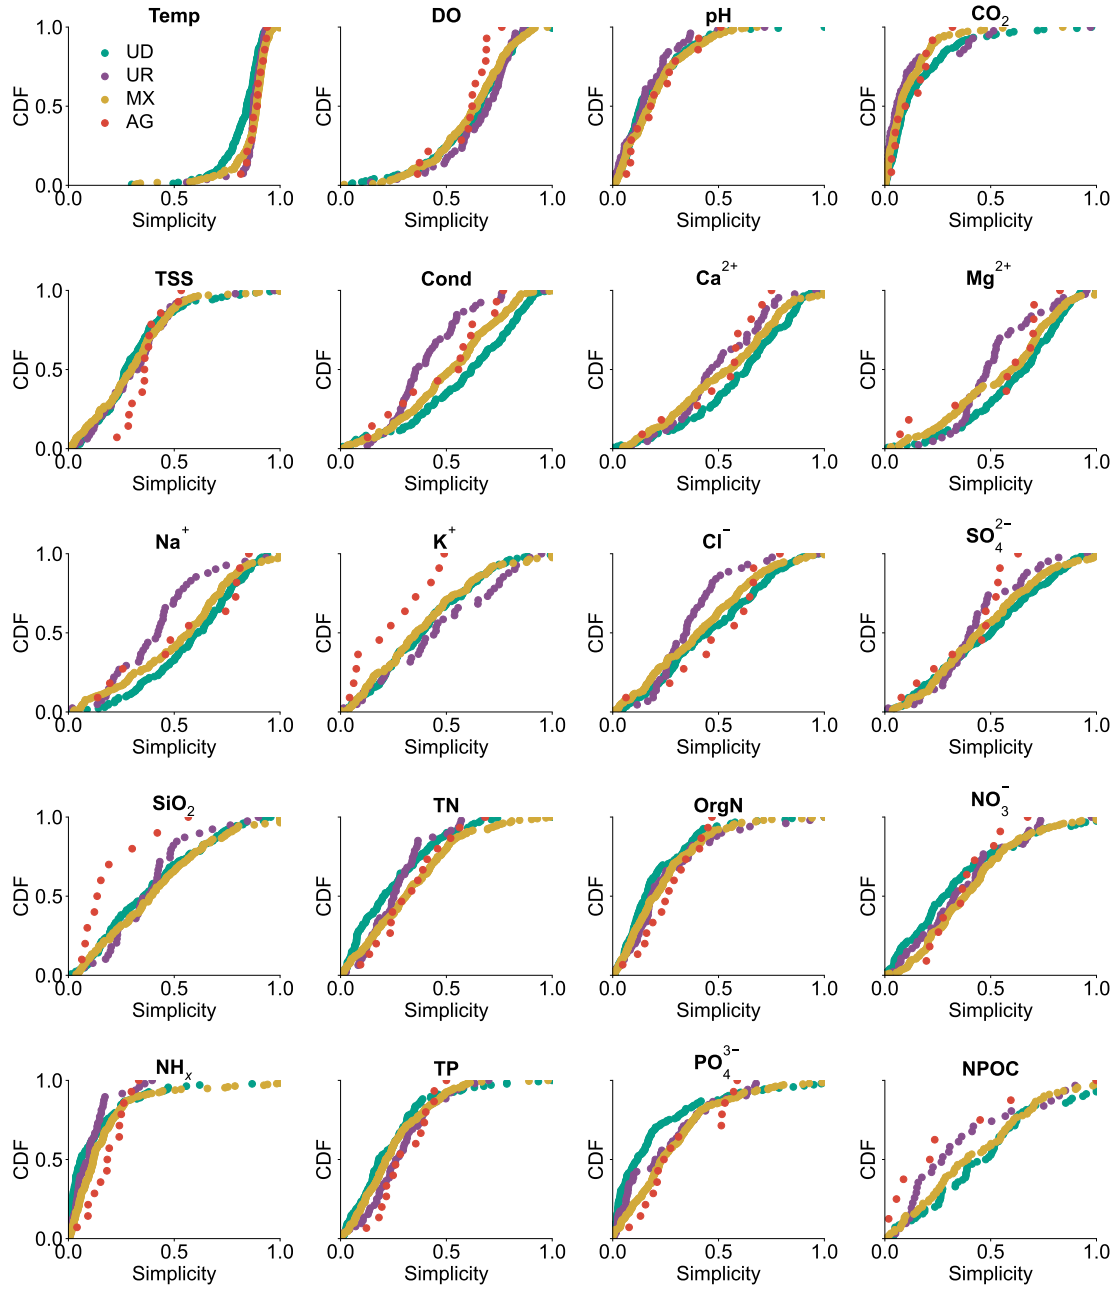

**Fig. S4.** Simplicity index distributions across undeveloped basins (UD), urban basins (UR), mixed basins (MX), and agricultural basins (AG). The simplicity index (adapted from [2]) quantifies the proportion of variance in water quality dynamics explained by linear relationships with runoff and annual cycles. Lower CDF (cumulative distribution function) curves indicate higher simplicity.

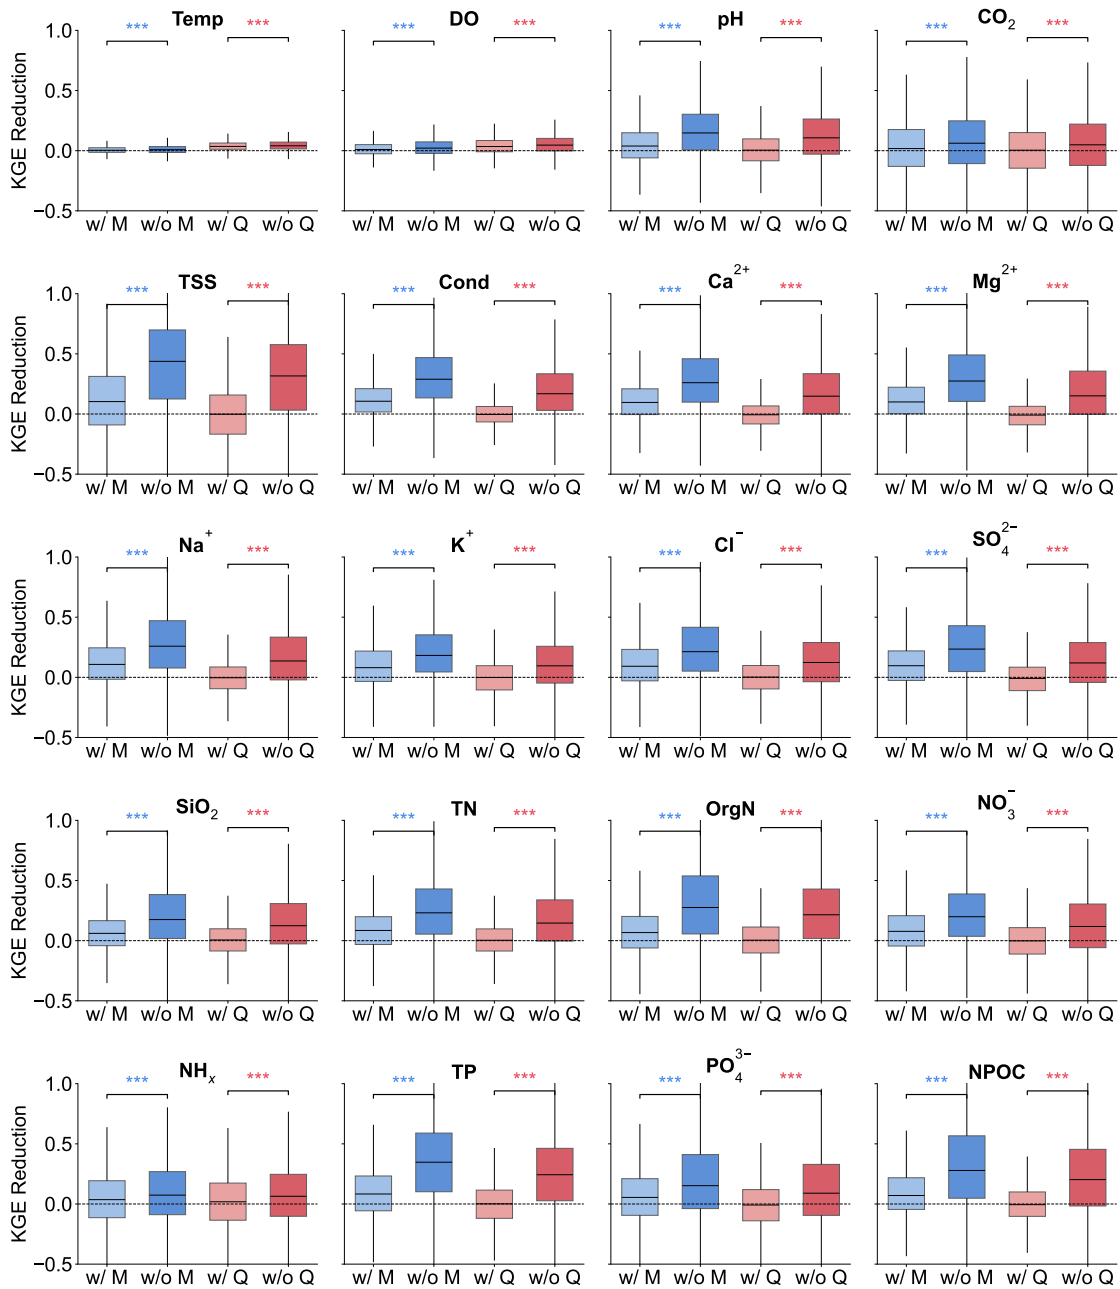

**Fig. S5.** Context-dependent feature importance (KGE reduction) of meteorological variables (M) and runoff (Q) derived via the Traverse method. Dark blue boxplots represent KGE reduction from excluding Q when M is already excluded, whereas light blue boxplots represent excluding Q when M is included. Similarly, dark red boxplots show the KGE reduction from excluding M when Q is absent, whereas light red boxplots represent excluding M when Q is included. Wilcoxon signed-rank tests were conducted to assess whether median KGE reductions from subsets lacking Q or M were significantly greater than those from subsets where Q or M were present ( $***p \leq 0.001$ ). The results indicate that meteorological variables become largely redundant when runoff is included.



**Table S1.** Summary of the studied water quality variables and the average number of observations per basin, based on 482 U.S. rivers between 01/01/1982 and 12/31/2018.

| USGS code | Description                      | Abbreviation                                                        | Unit                                  | # Observations per basin |
|-----------|----------------------------------|---------------------------------------------------------------------|---------------------------------------|--------------------------|
| 00010     | Water temperature                | Temp                                                                | °C                                    | 330.5                    |
| 00095     | Specific conductance             | Cond                                                                | uS/cm at 25°C                         | 285.6                    |
| 00300     | Oxygen                           | DO                                                                  | mg/L                                  | 197.8                    |
| 00040     | pH                               | pH                                                                  | -                                     | 224.9                    |
| 00405     | Carbon dioxide                   | CO <sub>2</sub>                                                     | mg/L                                  | 129.2                    |
| 00600     | Total nitrogen                   | TN                                                                  | mg/L                                  | 193.3                    |
| 00605     | Organic nitrogen                 | OrgN                                                                | mg/L                                  | 171.7                    |
| 00618     | Nitrate                          | NO <sub>3</sub> <sup>-</sup>                                        | mg/L as N                             | 138.3                    |
| 00660     | Orthophosphate                   | PO <sub>4</sub> <sup>3-</sup>                                       | mg/L as PO <sub>4</sub> <sup>3-</sup> | 204.9                    |
| 00665     | Total phosphorus                 | TP                                                                  | mg/L as P                             | 266.9                    |
| 00681     | Organic carbon                   | NPOC                                                                | mg/L                                  | 60.3                     |
| 00915     | Calcium                          | Ca <sup>2+</sup>                                                    | mg/L                                  | 131.7                    |
| 00925     | Magnesium                        | Mg <sup>2+</sup>                                                    | mg/L                                  | 131.8                    |
| 00930     | Sodium                           | Na <sup>+</sup>                                                     | mg/L                                  | 117.3                    |
| 00935     | Potassium                        | K <sup>+</sup>                                                      | mg/L                                  | 114.8                    |
| 00940     | Chloride                         | Cl <sup>-</sup>                                                     | mg/L                                  | 184.1                    |
| 00945     | Sulfate                          | SO <sub>4</sub> <sup>2-</sup>                                       | mg/L                                  | 154.3                    |
| 00955     | Silica                           | SiO <sub>2</sub>                                                    | mg/L                                  | 116.1                    |
| 71846     | Ammonia and ammonium             | NH <sub>x</sub> (NH <sub>3</sub> and NH <sub>4</sub> <sup>+</sup> ) | mg/L as NH <sub>4</sub> <sup>+</sup>  | 184.1                    |
| 80154     | Suspended sediment concentration | TSS                                                                 | mg/L                                  | 305.4                    |

**Table S2.** Model input features, consisting of 25 time series variables and 49 static basin attributes (sourced from the GAGES-II database).

| Group                      | Name                  | Type         | Description                                                                                                                                                                                                                                                    | Unit                           |
|----------------------------|-----------------------|--------------|----------------------------------------------------------------------------------------------------------------------------------------------------------------------------------------------------------------------------------------------------------------|--------------------------------|
| Runoff                     | runoff                | time-varying | Area normalized streamflow from USGS                                                                                                                                                                                                                           | m/y                            |
| Meteorological forcings    | pr                    | time-varying | Daily total precipitation                                                                                                                                                                                                                                      | mm/day                         |
|                            | sph                   | time-varying | Specific humidity                                                                                                                                                                                                                                              |                                |
|                            | srad                  | time-varying | Surface downwelling solar radiation                                                                                                                                                                                                                            | W/m <sup>2</sup>               |
|                            | tmmn                  | time-varying | Daily minimum 2-meter air temperature                                                                                                                                                                                                                          | F                              |
|                            | tmmx                  | time-varying | Daily maximum 2-meter air temperature                                                                                                                                                                                                                          | F                              |
|                            | pet                   | time-varying | Reference grass evapotranspiration                                                                                                                                                                                                                             | mm/day                         |
|                            | etr                   | time-varying | Reference alfalfa evapotranspiration                                                                                                                                                                                                                           | mm/day                         |
| Rainfall chemistry         | pH                    | time-varying | Logarithm of the H ion activity                                                                                                                                                                                                                                | unitless                       |
|                            | Cond                  | time-varying | Electrical conductivity of water                                                                                                                                                                                                                               | μS/cm                          |
|                            | Ca <sup>2+</sup>      | time-varying | Ca ion concentration                                                                                                                                                                                                                                           | mg/L                           |
|                            | Mg <sup>2+</sup>      | time-varying | Mg ion concentration                                                                                                                                                                                                                                           | mg/L                           |
|                            | K <sup>+</sup>        | time-varying | K ion concentration                                                                                                                                                                                                                                            | mg/L                           |
|                            | Na <sup>+</sup>       | time-varying | Na ion concentration                                                                                                                                                                                                                                           | mg/L                           |
|                            | NH <sub>4</sub>       | time-varying | NH <sub>4</sub> concentration                                                                                                                                                                                                                                  | mg/L                           |
|                            | NO <sub>3</sub>       | time-varying | NO <sub>3</sub> concentration                                                                                                                                                                                                                                  | mg/L                           |
|                            | Cl <sup>-</sup>       | time-varying | Cl ion concentration                                                                                                                                                                                                                                           | mg/L                           |
|                            | SO <sub>4</sub>       | time-varying | SO <sub>4</sub> concentration                                                                                                                                                                                                                                  | mg/L                           |
|                            | distNTN               | time-varying | The distance to the nearest NTN sampling site                                                                                                                                                                                                                  | km                             |
| Vegetation indices         | LAI                   | time-varying | Leaf area index of vegetation                                                                                                                                                                                                                                  | m <sup>2</sup> /m <sup>2</sup> |
|                            | FAPAR                 | time-varying | Fraction of absorbed photosynthetically active radiation                                                                                                                                                                                                       | unitless                       |
|                            | NPP                   | time-varying | Net primary production                                                                                                                                                                                                                                         | gC/m <sup>2</sup> /day         |
| Time variables             | datenum               | time-varying | The number of days relative to January 1, 2000                                                                                                                                                                                                                 | unitless                       |
|                            | sinT                  | time-varying | Sine of datenum                                                                                                                                                                                                                                                | unitless                       |
|                            | cosT                  | time-varying | Cosine of datenum                                                                                                                                                                                                                                              | unitless                       |
| Basic characteristics      | HYDRO_DISTURB_INDXX   | static       | Hydrologic “disturbance index” score, based on 7 variables:<br>1) MAJ_DDENS_2009, 2) WATER_WITHDR,<br>3) change in dam storage 1950-2009, 4) CANALS_PCT,<br>5) RAW_DIS_NEAREST_MAJ_NPDES, 6) ROADS_KM_SQ_KM,<br>and 7) FRAGUN_BASIN                            | unitless                       |
|                            | BAS_COMPACTNESS       | static       | Watershed compactness ratio, = area/perimeter <sup>2</sup> * 100;<br>higher number = more compact shape                                                                                                                                                        | unitless                       |
|                            | DRAIN_SQKM            | static       | Watershed drainage area, sq km, as delineated in our basin boundary                                                                                                                                                                                            | km <sup>2</sup>                |
| Geology                    | GEOL_REEDBUSH_DOM     | static       | Dominant (highest percent of area) geology, derived from a simplified version of Reed & Bush (2001) - Generalized Geologic Map of the Conterminous United States                                                                                               | unitless                       |
|                            | GEOL_REEDBUSH_DOM_PCT | static       | Percentage of the watershed covered by the dominant geology type                                                                                                                                                                                               | percentage                     |
| Hydrologic characteristics | STREAMS_K_S_KM        | static       | Stream density, km of streams per watershed sq km, from NHD 100k streams                                                                                                                                                                                       | km/km <sup>2</sup>             |
|                            | STRAHLER_MAX          | static       | Maximum Strahler stream order in the watershed, from NHDPlus                                                                                                                                                                                                   | unitless                       |
|                            | MAINSTEM_SINUOSITY    | static       | Sinuosity of mainstem stream line, from our delineation of mainstem stream lines. Defined as curvilinear length of the mainstem stream line divided by the straight-line distance between the end points of the line.                                          | unitless                       |
|                            | BFLAVE                | static       | Base Flow Index (BFI). The BFI is a ratio of base flow to total streamflow, expressed as a percentage and ranging from 0 to 100. Base flow is the sustained, slowly varying component of streamflow, usually attributed to ground-water discharge to a stream. | percentage                     |
|                            | CONTACT               | static       | Subsurface flow contact time index                                                                                                                                                                                                                             | days                           |
|                            | PCT_1ST_ORDER         | static       | Percent of stream lengths in the watershed which are first-order streams (Strahler order); from NHDPlus & percentage                                                                                                                                           | percentage                     |
|                            | PCT_2ND_ORDER         | static       | Percent of stream lengths in the watershed which are second-order streams (Strahler order); from NHDPlus & percentage                                                                                                                                          | percentage                     |
|                            | PCT_3RD_ORDER         | static       | Percent of stream lengths in the watershed which are third-order streams (Strahler order); from NHDPlus & percentage                                                                                                                                           | percentage                     |
|                            | PCT_4TH_ORDER         | static       | Percent of stream lengths in the watershed which are fourth-order streams (Strahler order); from NHDPlus & percentage                                                                                                                                          | percentage                     |
|                            | PCT_5TH_ORDER         | static       | Percent of stream lengths in the watershed which are fifth-order streams (Strahler order); from NHDPlus & percentage                                                                                                                                           | percentage                     |
|                            | PCT_6TH_ORDER_OR_MORE | static       | Percent of stream lengths in the watershed which are sixth or greater-order streams (Strahler order); from NHDPlus & percentage                                                                                                                                | percentage                     |

| Group                                                        | Name              | Type   | Description                                                                                                                                                                                                                                                                                                                                                                     | Unit                               |
|--------------------------------------------------------------|-------------------|--------|---------------------------------------------------------------------------------------------------------------------------------------------------------------------------------------------------------------------------------------------------------------------------------------------------------------------------------------------------------------------------------|------------------------------------|
| Historical and current dams information                      | DDENS_2009        | static | Dam density; number per 100 km sq                                                                                                                                                                                                                                                                                                                                               | number of dams/100 km <sup>2</sup> |
|                                                              | STOR_NOR_2009     | static | Dam storage in watershed ("NORMAL_STORAGE"); megaliters total storage per sq km (1 megalitres = 1,000,000 liters = 1,000 cubic meters)                                                                                                                                                                                                                                          | megaliters/km <sup>2</sup>         |
| NPDES                                                        | NPDES_MAJ_DENS    | static | Density of NPDES (National Pollutant Discharge Elimination System) "major" point locations in the watershed; number per 100 km sq. Major locations are defined by an EPA-assigned major flag. From the download of NPDES national database summer 2006.                                                                                                                         | number of sites/100km <sup>2</sup> |
| Percentages of land cover 2006 in the watershed and lanscape | DEVNLCD06         | static | Watershed percent "developed" (urban), 2006 era (2001 for AK-HI-PR). Sum of classes 21, 22, 23, and 24.                                                                                                                                                                                                                                                                         | percentage                         |
|                                                              | FORESTNLCD06      | static | Watershed percent "forest", 2006 era (2001 for AK-HI-PR). Sum of classes 41, 42, and 43.                                                                                                                                                                                                                                                                                        | percentage                         |
|                                                              | PLANTNLCD06       | static | Watershed percent "planted/cultivated" (agriculture), 2006 era (2001 for AK-HI-PR). Sum of classes 81 and 82.                                                                                                                                                                                                                                                                   | percentage                         |
|                                                              | WATERNLCD06       | static | Watershed percent Open Water (class 11)                                                                                                                                                                                                                                                                                                                                         | percentage                         |
|                                                              | WOODYWETNLCD06    | static | Watershed percent Woody Wetlands (class 90)                                                                                                                                                                                                                                                                                                                                     | percentage                         |
|                                                              | EMERGWETNLCD06    | static | Watershed percent Emergent Herbaceous Wetlands (class 95)                                                                                                                                                                                                                                                                                                                       | percentage                         |
| Nitrogen and phosphorus application rate in the watershed    | NITR_APP_KG_SQKM  | static | Estimate of nitrogen from fertilizer and manure, from Census of Ag 1997, based on county-wide sales and percent agricultural land cover in the watershed.                                                                                                                                                                                                                       | kg/km <sup>2</sup>                 |
|                                                              | PHOS_APP_KG_SQKM  | static | Estimate of nitrogen from fertilizer and manure, from Census of Ag 1997, based on county-wide sales and percent agricultural land cover in the watershed.                                                                                                                                                                                                                       | kg/km <sup>2</sup>                 |
| Pesticide                                                    | PESTAPP_KG_SQKM   | static | Estimate of agricultural pesticide application (219 types), kg/sq km, from Census of Ag 1997, based on county-wide sales and percent agricultural land cover in the watershed                                                                                                                                                                                                   | kg/km <sup>2</sup>                 |
| Regions                                                      | ECO2_BAS_DOM      | static | Dominant (highest % of the area) Level II ecoregion within the watershed. See X_Region_Names sheet for crosswalk to name.                                                                                                                                                                                                                                                       | unitless                           |
|                                                              | ECO3_BAS_DOM      | static | Dominant (highest % of the area) Level III ecoregion within the watershed. See X_Region_Names sheet for crosswalk to name.                                                                                                                                                                                                                                                      | Level III ecoregion (1-84)         |
|                                                              | NUTR_BAS_DOM      | static | Dominant (highest % of the area) nutrient ecoregion within the watershed. See X_Region_Names sheet for crosswalk to name.                                                                                                                                                                                                                                                       | Nutrient ecoregion (1-14)          |
|                                                              | HLR_BAS_DOM.100M  | static | Dominant (highest % of the area) Hydrologic Landscape Region within the watershed. See X_Region_Names sheet for crosswalk to name.                                                                                                                                                                                                                                              | HLR region (1-20)                  |
|                                                              | PNV_BAS_DOM       | static | Dominant (highest % of the area) Potential Natural Vegetation (PNV) within the watershed. See X_Region_Names sheet for crosswalk to name.                                                                                                                                                                                                                                       | PNV type (1-63)                    |
| Soil                                                         | AWCAVE            | static | Average value for the range of available water capacity for the soil layer or horizon (inches of water per inch of soil depth)                                                                                                                                                                                                                                                  | unitless                           |
|                                                              | PERMAVE           | static | Average permeability (inches/hour)                                                                                                                                                                                                                                                                                                                                              | inches/hour                        |
|                                                              | BDAVE             | static | Average value of bulk density (grams per cubic centimeter)                                                                                                                                                                                                                                                                                                                      | grams per cubic centimeter         |
|                                                              | OMAVE             | static | Average value of organic matter content (percent by weight)                                                                                                                                                                                                                                                                                                                     | percentage                         |
|                                                              | WTDEPAVE          | static | Average value of depth to seasonally high water table (feet)                                                                                                                                                                                                                                                                                                                    | feet                               |
|                                                              | ROCKDEPAVE        | static | Average value of total soil thickness examined (inches)                                                                                                                                                                                                                                                                                                                         | inches                             |
|                                                              | CLAYAVE           | static | Average value of clay content (percentage)                                                                                                                                                                                                                                                                                                                                      | percentage                         |
|                                                              | SILTAVE           | static | Average value of silt content (percentage)                                                                                                                                                                                                                                                                                                                                      | percentage                         |
|                                                              | KFACT_UP          | static | Average K-factor value for the uppermost soil horizon in each soil component. K-factor is an erodibility factor which quantifies the susceptibility of soil particles to detachment and movement by water. The K-factor is used in the Universal Soil Loss Equation (USLE) to estimate soil loss by water. Higher values of the K-factor indicate greater potential for erosion | unitless                           |
|                                                              | RFACT             | static | Rainfall and Runoff factor ("R factor" of Universal Soil Loss Equation); average annual value for the period 1971-2000.                                                                                                                                                                                                                                                         | 100s ft-tonf in/h/ac/yr            |
| Topographic characteristics                                  | ELEV_MEAN_M_BASIN | static | Mean watershed elevation (meters) from 100m National Elevation Dataset                                                                                                                                                                                                                                                                                                          | m                                  |
|                                                              | SLOPE_PCT         | static | Mean watershed slope, percent. Derived from 100m resolution National Elevation Dataset, so slope values may differ from those calculated from data of other resolutions.                                                                                                                                                                                                        | percentage                         |
|                                                              | ASPECT_DEGREES    | static | Mean watershed aspect, degrees (degrees of the compass, 0-360). Derived from 100m resolution National Elevation Data. 0 and 360 point to north, because of the national Albers projection actual aspect may vary.                                                                                                                                                               | degrees (0-360)                    |
| Latitude and Longitude                                       | LAT_GAGE          | static | Latitude at gage, decimal degrees                                                                                                                                                                                                                                                                                                                                               | decimal degrees, datum NAD83       |
|                                                              | LNG_GAGE          | static | Longitude at gage, decimal degrees                                                                                                                                                                                                                                                                                                                                              | decimal degrees, datum NAD83       |
| Snow                                                         | SNOW_PCT_PRECIP   | static | Snow percent of total precipitation estimate, mean for period 1901-2000. From McCabe and Wolock (submitted, 2008), 1km grid.                                                                                                                                                                                                                                                    | percentage                         |

## References

- [1] Spahr, N. E., Dubrovsky, N. M., Gronberg, J. M., Franke, O. L. & Wolock, D. M. Nitrate loads and concentrations in surface-water base flow and shallow groundwater for selected basins in the united states, water years 1990-2006. Tech. Rep., US Geological Survey (2010).
- [2] Fang, K., Caers, J. & Maher, K. Modeling continental us stream water quality using long-short term memory and weighted regressions on time, discharge, and season. *Frontiers in Water* **6**, 1456647 (2024).
